# Supplementary material for: Silkworm Pupa Protein Hydrolysate Induces Mitochondria-Dependent Apoptosis and S Phase Cell Cycle Arrest in Human Gastric Cancer SGC-7901 Cells
Source: PubMed Central journal article supplement (PMC5979490; doi:10.3390/ijms19041013), 2018-03-28
Supplement: ijms-19-01013-s001.pdf [file ijms-19-01013-s001.pdf]

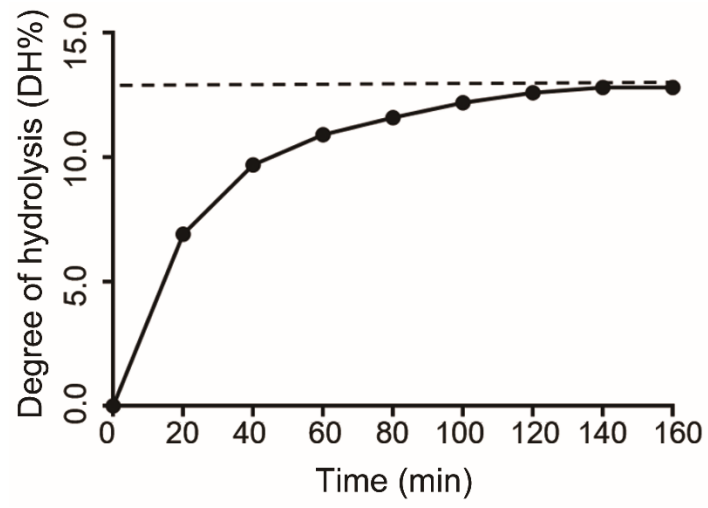

**Figure S1.** The hydrolysis curve of silkworm pupae by alcalase.

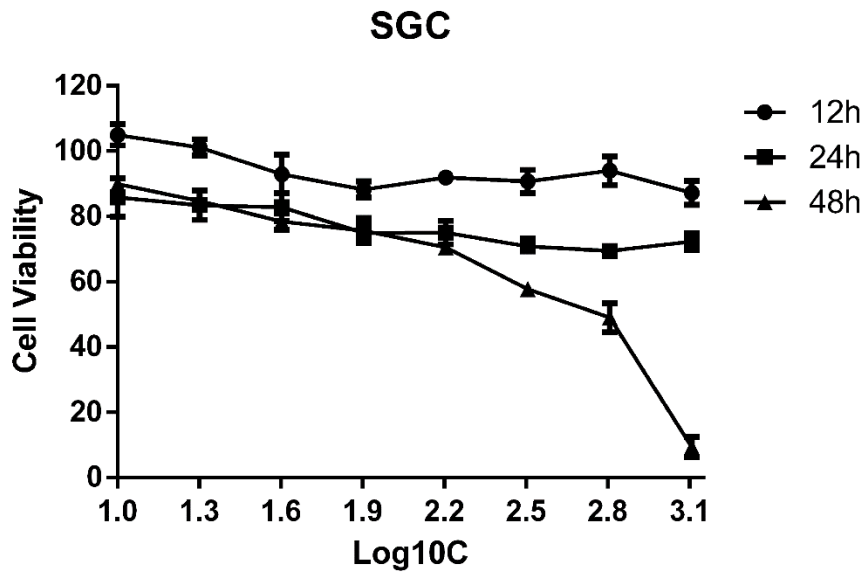

Figure S2. SPPH can inhibit SGC-7901 cell proliferation in a time-dependent manner.

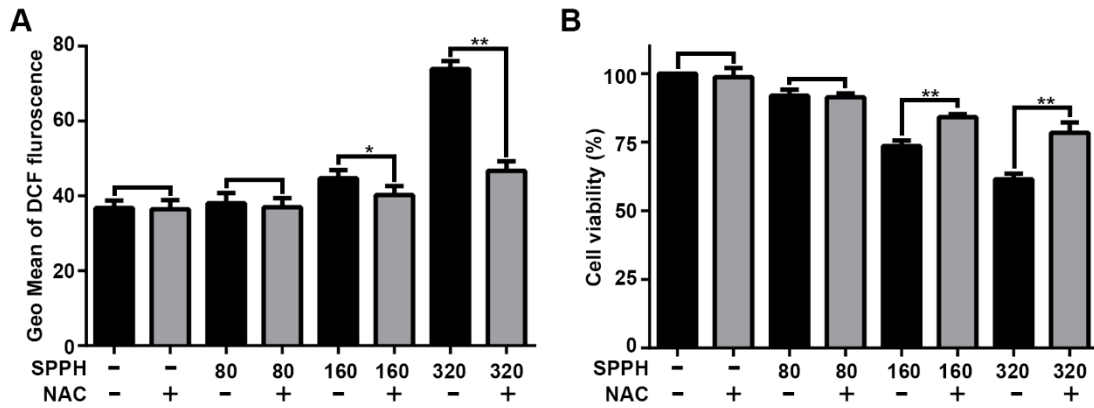

**Figure S3.** NAC (5mM) treatment can repress the SPPH-mediated ROS generation (A) and recover SPPH-mediated cell death (B). ROS generation was indicated by ROS indicator (DCF-DA) and ROS level was measured by flow cytometry. Cell viability was measured by using MTT method. SPPH treated with different concentrations 80, 160 320  $\mu\text{g}/\text{mL}$ . Data are expressed as Mean  $\pm$  SD (n=3). \*\* $P < 0.01$  versus control, \* $P < 0.05$  versus control.

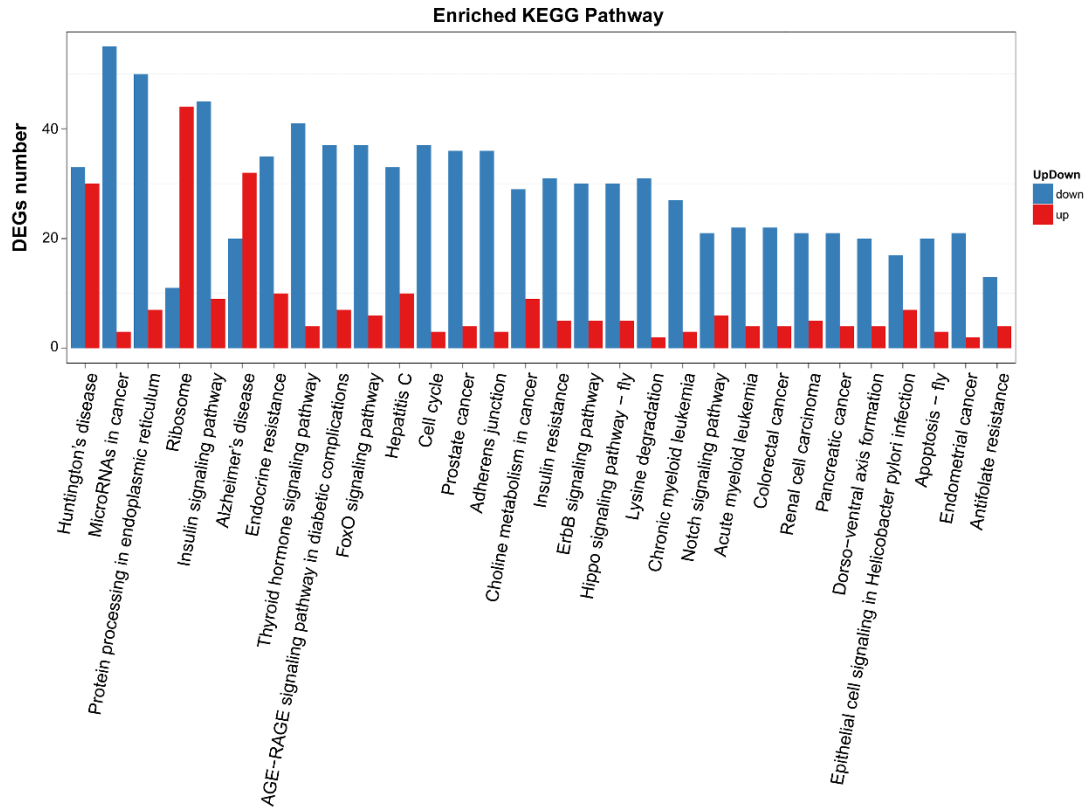

**Figure S4.** KEGG classification of DEGs.

**Enrichment plot: GO regulation of mesenchymal cell proliferation**

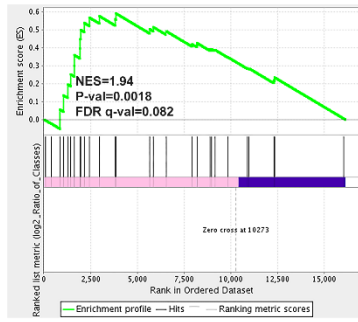

**Enrichment plot: GO protein complex involved in cell adhesion**

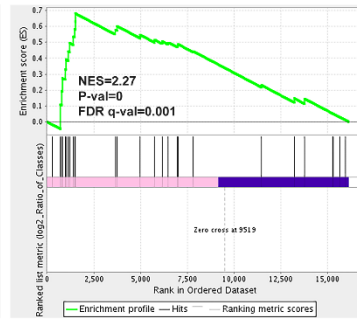

**Enrichment plot: GO inner mitochondrial membrane protein complex**

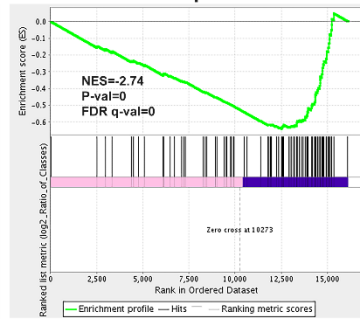

**Enrichment plot: GO oxidative phosphorylation**

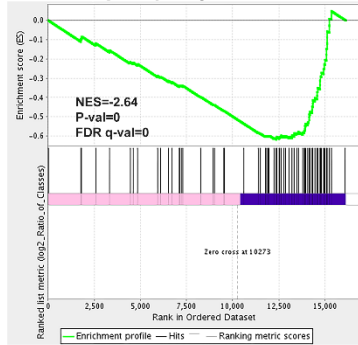

**Enrichment plot: GO mitochondrial membrane part**

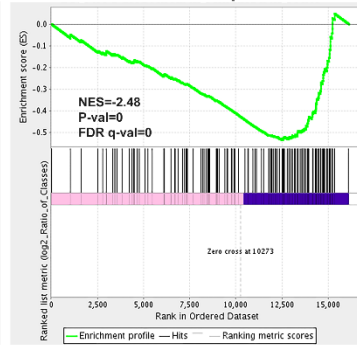

**Enrichment plot: GO mitochondrial protein complex**

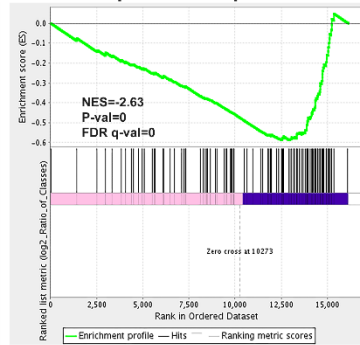

**Figure S5. GSEA revealed key enriched pathways after SPPH treatment.**

**Table S1.** Summary of transcriptome sequencing, assembly and annotation

| <b>Sample</b>  | <b>Total Raw Reads (Mb)</b> | <b>Total Clean Reads (Mb)</b> | <b>Total Clean Bases (Gb)</b> | <b>Clean Reads Q20 (%)</b> | <b>Clean Reads Q30 (%)</b> | <b>Clean Reads Ratio (%)</b> | <b>Total Mapping Ratio (%)</b> | <b>Unique Match (%)</b> |
|----------------|-----------------------------|-------------------------------|-------------------------------|----------------------------|----------------------------|------------------------------|--------------------------------|-------------------------|
| Control-1      | 24.14                       | 24.08                         | 1.20                          | 98.25                      | 91.14                      | 99.74                        | 81.88                          | 76.25                   |
| Control-2      | 24.14                       | 24.10                         | 1.20                          | 97.17                      | 88.61                      | 99.84                        | 85.89                          | 80.93                   |
| SPEH-treated-1 | 24.14                       | 23.95                         | 1.20                          | 98.39                      | 91.53                      | 99.22                        | 87.58                          | 81.38                   |
| SPEH-treated-2 | 24.14                       | 24.10                         | 1.21                          | 97.21                      | 88.77                      | 99.85                        | 84.68                          | 79.84                   |
